# Supplementary material for: (Arg)9-SH2 superbinder: a novel promising anticancer therapy to melanoma by blocking phosphotyrosine signaling
Source: PubMed Central journal article supplement (PMC6034221; doi:10.1186/s13046-018-0812-5), 2018-07-05
Supplement: 13046_2018_812_MOESM1_ESM.pdf [file 13046_2018_812_MOESM1_ESM.pdf]

**Table S1 The amino acid sequences of constructs (N-C).**

|                                       |                                                                                                                                                                                                                                                                                                                                                                                  |
|---------------------------------------|----------------------------------------------------------------------------------------------------------------------------------------------------------------------------------------------------------------------------------------------------------------------------------------------------------------------------------------------------------------------------------|
| Src SH2 Wt                            | <u>WYFGKITRRESERLLLNAENPRGTFLLVRESETTKGAYCLSVSDFDNAKGLNVKHYKIRKLDSGGFYITSRTQFNSLQQLVAYYSKHADGLCHRLTTVC</u>                                                                                                                                                                                                                                                                       |
| Src SH2 TrM                           | <u>WYFGKITRRESERLLLNAENPRGTFLLVRESETVKGAYALSVDNAKGLNVKHYLIRKLDSGGFYITSRTQFNSLQQLVAYYSKHADGLCHRLTTVC</u>                                                                                                                                                                                                                                                                          |
| GST-Src SH2<br>Wt-(Arg) <sub>9</sub>  | <u>MSPILGYWKIKGLVQPTRLLEYLEEKYEEHLYERDEGDKWRNKKFELGLEFPNLPYYIDGDVKLTQSMAIIRYIADKHNMLGGCPKERAIEI<br/>SMLEGAVLDIRYGVSRIAYSKDFETLKVDFLSKLPEMLKMFEDRLCHKTYLNGDHVTHPDFMLYDALDVVLYMDPMCLDAFPKLVCFKKR<br/>IEAIPQIDKYLKSSKYIAWPLQGWQATFGGGDHPPKSDLVPRGSDSIQAEEWYFGKITRRESERLLLNAENPRGTFLLVRESETTKGAYCLSVS<br/>DFDNAKGLNVKHYKIRKLDSGGFYITSRTQFNSLQQLVAYYSKHADGLCHRLTTVCPTSKGRRRRRRRRR</u> |
| GST-Src SH2<br>TrM-(Arg) <sub>9</sub> | <u>MSPILGYWKIKGLVQPTRLLEYLEEKYEEHLYERDEGDKWRNKKFELGLEFPNLPYYIDGDVKLTQSMAIIRYIADKHNMLGGCPKERAIEI<br/>SMLEGAVLDIRYGVSRIAYSKDFETLKVDFLSKLPEMLKMFEDRLCHKTYLNGDHVTHPDFMLYDALDVVLYMDPMCLDAFPKLVCFKKR<br/>IEAIPQIDKYLKSSKYIAWPLQGWQATFGGGDHPPKSDLVPRGSDSIQAEEWYFGKITRRESERLLLNAENPRGTFLLVRESETVKGAYALSVS<br/>DFDNAKGLNVKHYLIRKLDSGGFYITSRTQFNSLQQLVAYYSKHADGLCHRLTTVCPTSKGRRRRRRRRR</u> |
| GST-(Arg) <sub>9</sub>                | <u>MSPILGYWKIKGLVQPTRLLEYLEEKYEEHLYERDEGDKWRNKKFELGLEFPNLPYYIDGDVKLTQSMAIIRYIADKHNMLGGCPKERAIEI<br/>SMLEGAVLDIRYGVSRIAYSKDFETLKVDFLSKLPEMLKMFEDRLCHKTYLNGDHVTHPDFMLYDALDVVLYMDPMCLDAFPKLVCFKKR<br/>IEAIPQIDKYLKSSKYIAWPLQGWQATFGGGDHPPKSDLVPRGSRRRRRRRRR</u>                                                                                                                     |
| GST-Src SH2<br>Wt                     | <u>MSPILGYWKIKGLVQPTRLLEYLEEKYEEHLYERDEGDKWRNKKFELGLEFPNLPYYIDGDVKLTQSMAIIRYIADKHNMLGGCPKERAIEI<br/>SMLEGAVLDIRYGVSRIAYSKDFETLKVDFLSKLPEMLKMFEDRLCHKTYLNGDHVTHPDFMLYDALDVVLYMDPMCLDAFPKLVCFKKR<br/>IEAIPQIDKYLKSSKYIAWPLQGWQATFGGGDHPPKSDLVPRGSDSIQAEEWYFGKITRRESERLLLNAENPRGTFLLVRESETTKGAYCLSVS<br/>DFDNAKGLNVKHYKIRKLDSGGFYITSRTQFNSLQQLVAYYSKHADGLCHRLTTVCPTSK</u>           |

GST-Src SH2 MSPILGYWKIKGLVQPTRLLEYLEEKYEEHLYERDEGDKWRNKKFELGLEFPNLPYYIDGDVKLTQSMAIIRYIADKHNMLGGCPKERA EI  
TrM SMLEGAVLDIRYGVSRIAYS KDFETLKVDFLSKLPEMLKMFEDRLCHKTYLNGDHVTHPDFMLYDALDVVLYMDPMCLDAFPKLVCFKKR  
IEAIPQIDKYLKSSKYIAWPLQGWQATFGGGDHPPKSDLVPRGSDSIQAEEWYFGKITRRESERLLLNAENPRGTFLVRESETVKGAYALSVS  
DFDNAKGLNVKHYLIRKLDSGGFYITSRTQFNSLQQLVAYYSKHADGLCHRLTTVCPTSK

---

Src SH2 Wt or TrM sequences are underlined with wavy line. Tripe mutant sites are marked in **red** and **bold**. GST sequences are underlined with straight line. Sequence of (Arg)<sub>9</sub> was underlined with dotted line. GST-(Arg)<sub>9</sub> and GST-Src-SH2-Wt/TrM-(Arg)<sub>9</sub> were termed as (Arg)<sub>9</sub>-GST and (Arg)<sub>9</sub>-GST-Src-SH2-Wt/TrM in the manuscript.
