# Supplementary material for: (Arg)9-SH2 superbinder: a novel promising anticancer therapy to melanoma by blocking phosphotyrosine signaling
Source: Springer Nature journal article supplement (doi:10.1186/s13046-018-0812-5), 2018-07-05
Supplement: MOESM2 [file 15911360]

**Table S2****Sequences of Primers**

| <b>Plasmid</b>                              | <b>Forward Primers(5'-3')</b>                   | <b>Reverse Primers(5'-3')</b>                                                      |
|---------------------------------------------|-------------------------------------------------|------------------------------------------------------------------------------------|
| pGEX-4T3-<br>Src SH2 TrM-(Arg) <sub>9</sub> | ATCTGGTTCCGCGTGGATC<br>CGACTCCATCCAGGCTGA<br>GG | AGTCACGATGCGGCCG<br>CTACGGCGGCGACGAC<br>GGCGGCGACGACGGCC<br>CTTGGACGTGGGGCAC<br>AC |
| pGEX-4T3-<br>Src SH2 Wt-(Arg) <sub>9</sub>  | ATCTGGTTCCGCGTGGATC<br>CGACTCCATCCAGGCTGA<br>GG | AGTCACGATGCGGCCG<br>CTACGGCGGCGACGAC<br>GGCGGCGACGACGGCC<br>CTTGGACGTGGGGCAC<br>AC |
| pGEX-4T3-<br>Src SH2 TrM                    | ATCTGGTTCCGCGTGGATC<br>CGACTCCATCCAGGCTGA<br>GG | AGTCACGATGCGGCCG<br>CTCTTGGACGTGGGGC<br>ACAC                                       |
| pGEX-4T3-<br>Src SH2 Wt                     | ATCTGGTTCCGCGTGGATC<br>CGACTCCATCCAGGCTGA<br>GG | AGTCACGATGCGGCCG<br>CTCTTGGACGTGGGGC<br>ACAC                                       |
| pGEX-4T3-(Arg) <sub>9</sub>                 | ATCTGGTTCCGCGTGGATC<br>CCGTCGTCGCCGC            | AGTCACGATGCGGCCG<br>CTACGGCGGCGACGAC                                               |
